# Supplementary material
Source: PubMed Central journal article supplement (PMC2680112)

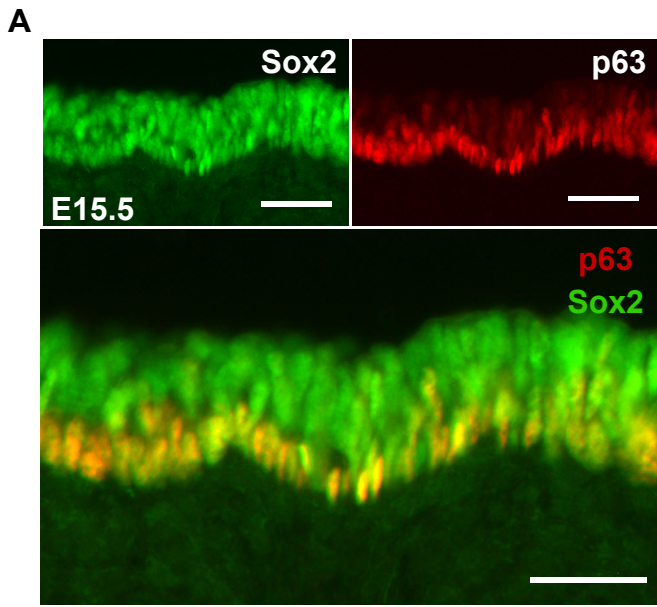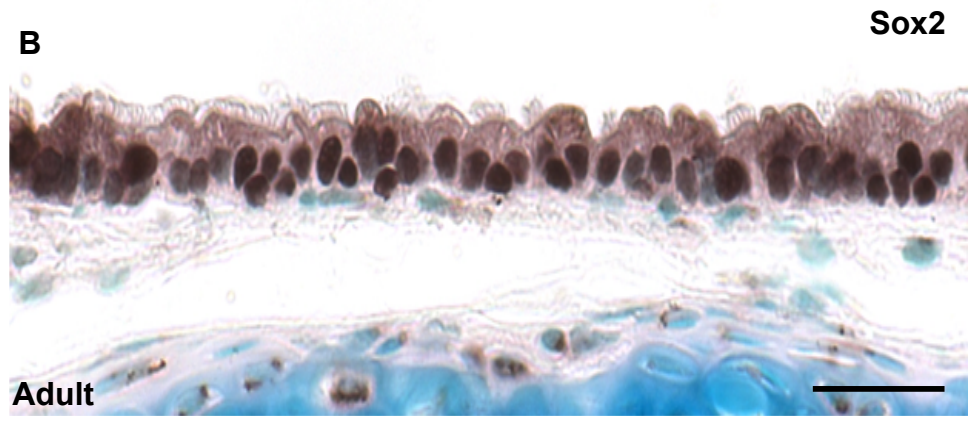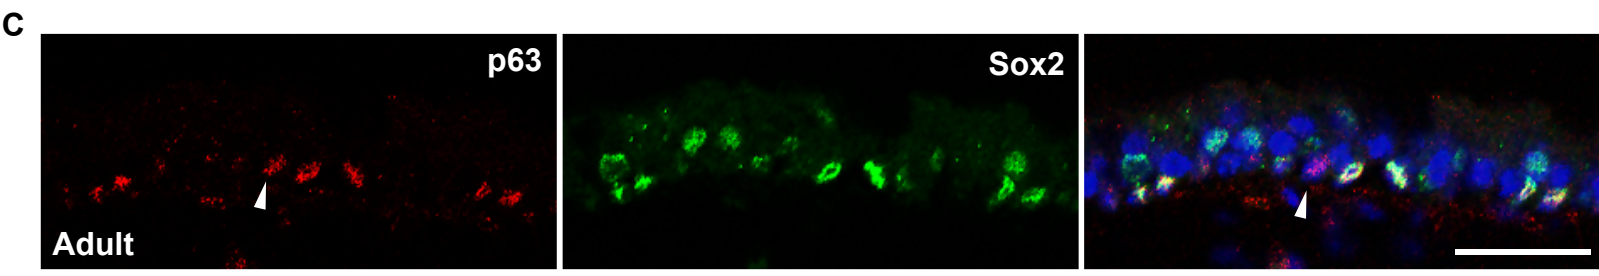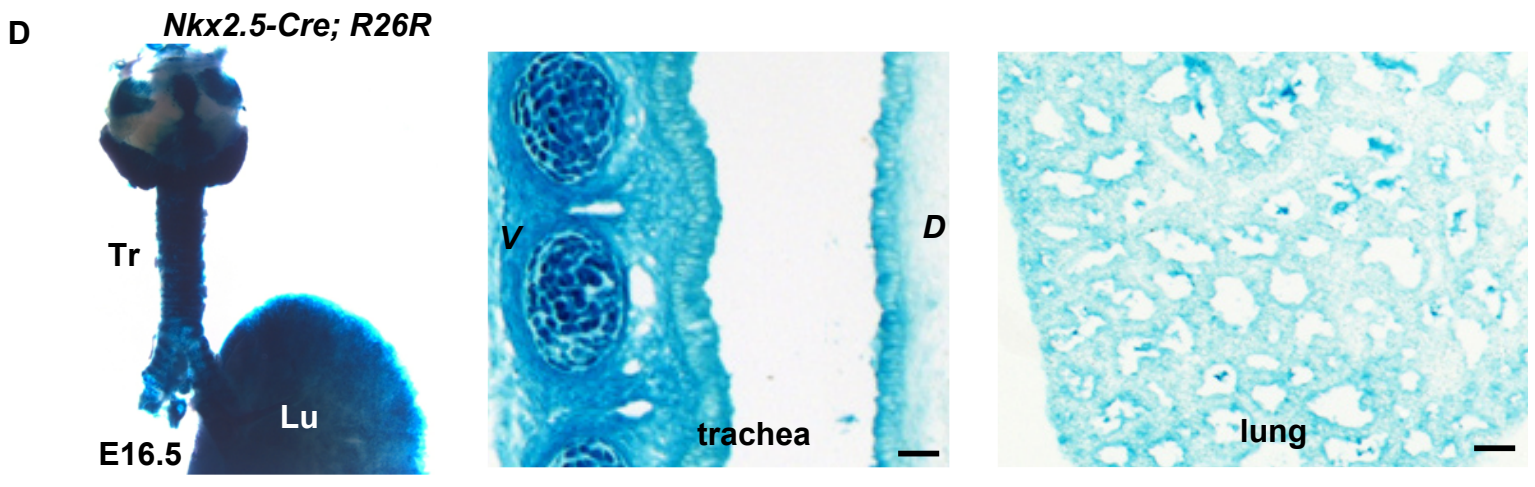

Supplement: supp_136_11_1899__1.pdf [file supp_136_11_1899__1.pdf]
